# Supplementary material
Source: PubMed Central journal article supplement (PMC4924590)
Supplement: NIHMS797145-supplement-Supplemental_Table_1.pdf [file NIHMS797145-supplement-Supplemental_Table_1.pdf]

**Supplementary Table 1**

| <b>Treatment</b>   | <b>Reference</b>                                                                                                                                                                                                                                                                                                                                                                                                                           |
|--------------------|--------------------------------------------------------------------------------------------------------------------------------------------------------------------------------------------------------------------------------------------------------------------------------------------------------------------------------------------------------------------------------------------------------------------------------------------|
| AAV9/ <i>Mecp2</i> | Garg, S.K. et al. (2013) Systemic delivery of MeCP2 rescues behavioral and cellular deficits in female mouse models of Rett syndrome. <i>J. Neurosci.</i> 33,13612-20.<br><br>Gadalla, K.K. et al. (2013) Improved survival and reduced phenotypic severity following AAV9/MECP2 gene transfer to neonatal and juvenile male <i>Mecp2</i> knockout mice. <i>Mol. Ther.</i> 21,18-30.                                                       |
| Desipramine        | Roux, J.C. et al. (2007) Treatment with desipramine improves breathing and survival in a mouse model for Rett syndrome. <i>Eur. J. Neurosci.</i> 25, 1915–1922.                                                                                                                                                                                                                                                                            |
| Clenbuterol        | Mellios, N. et al. (2014) $\beta$ 2-Adrenergic receptor agonist ameliorates phenotypes and corrects microRNA-mediated IGF1 deficits in a mouse model of Rett syndrome. <i>Proc. Natl. Acad. Sci. U.S.A.</i> 111, 9947-9952.                                                                                                                                                                                                                |
| Citalopram         | Toward, M.A. et al. (2013) Increasing brain serotonin corrects CO2 chemosensitivity in methyl-CpG-binding protein 2 ( <i>Mecp2</i> )-deficient mice. <i>Exp. Physiol.</i> 98 842-849.                                                                                                                                                                                                                                                      |
| LP-211             | De Filippis, B. et al. (2015) Long-lasting beneficial effects of central serotonin receptor 7 stimulation in female mice modeling Rett syndrome. <i>Front. Behav. Neurosci.</i> DOI: 10.3389/fnbeh.2015.00086.                                                                                                                                                                                                                             |
| L-Dopa             | Szczesna, K. et al. (2014) Improvement of the Rett Syndrome phenotype in a <i>Mecp2</i> mouse model upon treatment with Levodopa and a Dopa-Decarboxylase Inhibitor. <i>Neuropsychopharmacology</i> 39, 2846–2856.                                                                                                                                                                                                                         |
| Benserazide        |                                                                                                                                                                                                                                                                                                                                                                                                                                            |
| Sarizotan          | Abdala, A.P. et al. (2014) Effect of sarizotan, a 5-HT1a and D2-like receptor agonist, on respiration in the three mouse models of Rett syndrome. <i>Am. J. Respir. Cell. Mol. Biol.</i> 50, 1031-1039.                                                                                                                                                                                                                                    |
| NLX-101            | Levitt, E.S. et al. (2013) A selective 5-HT1a receptor agonist improves respiration in a mouse model of Rett syndrome. <i>J. Appl. Physiol.</i> 115, 1626-1633.                                                                                                                                                                                                                                                                            |
| Ketamine           | Patrizi, A. et al. (2015) Chronic administration of the N-Methyl-D-Aspartate receptor antagonist ketamine improves Rett Syndrome phenotype. <i>Biol. Psychiatry</i> DOI: 10.1016/j.biopsych.2015.08.018.                                                                                                                                                                                                                                   |
| Midazolam          | Voituron, N. and Hilaire, G. (2011) The benzodiazepine Midazolam mitigates the breathing defects of <i>Mecp2</i> -deficient mice. <i>Respir. Physiol. Neurobiol.</i> 177, 56-60.                                                                                                                                                                                                                                                           |
| NO-711             | Abdala, A.P. et al. (2010) Correction of respiratory disorders in a mouse model of Rett syndrome. <i>Proc. Natl. Acad. Sci. U.S.A.</i> 107, 18208-18213.                                                                                                                                                                                                                                                                                   |
| L-838,417          |                                                                                                                                                                                                                                                                                                                                                                                                                                            |
| Acetyl-L-carnitine | Schaevitz, L.R. et al. (2012) Acetyl-L-carnitine improves behavior and dendritic morphology in a mouse model of Rett syndrome. <i>PLoS One</i> DOI: 10.1371/journal.pone.0051586.                                                                                                                                                                                                                                                          |
| Choline            | Riccer, L. et al. (2011) Cholinergic hypofunction in MeCP2-308 mice: beneficial neurobehavioural effects of neonatal choline supplementation. <i>Behav. Brain. Res.</i> 221, 623-629.                                                                                                                                                                                                                                                      |
| LM22A-4            | Kron, M. et al. (2014) A BDNF loop-domain mimetic acutely reverses spontaneous apneas and respiratory abnormalities during behavioral arousal in a mouse model of Rett syndrome. <i>Dis. Model Mech.</i> 7, 1047-1055.<br><br>Schmid, D. et al. (2011) A TrkB small molecule partial agonist rescues TrkB phosphorylation deficits and improves respiratory function in a mouse model of Rett syndrome. <i>J. Neurosci.</i> 32, 1803-1810. |
| Fingolimod         | Deogracias, R. et al. (2012) Fingolimod, a sphingosine-1 phosphate receptor modulator, increases BDNF levels and improves symptoms of a mouse model of Rett syndrome. <i>Proc. Natl. Acad. Sci. U.S.A.</i> 109, 14230-14235.                                                                                                                                                                                                               |
| 7,8-DHF            | Johnson, R.A. et al. (2012) 7,8-dihydroxyflavone exhibits therapeutic efficacy in a mouse model of Rett syndrome. <i>J. Appl. Physiol.</i> (1985). 112, 704-710.                                                                                                                                                                                                                                                                           |
| CX546              | Ogier, M. et al. (2007) Brain-derived neurotrophic factor expression and respiratory                                                                                                                                                                                                                                                                                                                                                       |

|                                   |                                                                                                                                                                                                                                                                          |
|-----------------------------------|--------------------------------------------------------------------------------------------------------------------------------------------------------------------------------------------------------------------------------------------------------------------------|
|                                   | function improve after ampakine treatment in a mouse model of Rett syndrome. <i>J. Neurosci.</i> 27, 10912-10917.                                                                                                                                                        |
| Copaxone                          | Ben-Zeev, B. et al. (2011) Glatiramer acetate (GA, Copolymer-1) an hypothetical treatment option for Rett syndrome. <i>Med. Hypotheses</i> 76, 190-193.                                                                                                                  |
| CPT157633                         | Krishnan, N. et al. (2015). PTP1B inhibition suggests a therapeutic strategy for Rett syndrome. <i>J. Clin. Invest.</i> 125, 3163-77.                                                                                                                                    |
| UA0713                            | Krishnan, N. et al. (2015). PTP1B inhibition suggests a therapeutic strategy for Rett syndrome. <i>J. Clin. Invest.</i> 125, 3163-77.                                                                                                                                    |
| rhIGF1                            | Castro, J. et al. (2014) Functional recovery with recombinant human IGF1 treatment in a mouse model of Rett Syndrome. <i>Proc. Natl. Acad. Sci. U.S.A.</i> 111, 9941-9946.                                                                                               |
| (1-3) IGF-1                       | Tropea, D. et al. (2009) Partial reversal of Rett Syndrome-like symptoms in MeCP2 mutant mice. <i>Proc. Natl. Acad. Sci. U.S.A.</i> 106, 2029-2034.                                                                                                                      |
| Statins (Fluvastatin, Lovastatin) | Buchovecky, C.M. et al. (2013) A suppressor screen in <i>Mecp2</i> mutant mice implicates cholesterol metabolism in Rett syndrome. <i>Nat. Genet.</i> 45, 1013-1020.                                                                                                     |
| Corticosterone                    | De Filippis B. et al. (2013) Neonatal exposure to low dose corticosterone persistently modulates hippocampal mineralocorticoid receptor expression and improves locomotor/exploratory behaviour in a mouse model of Rett syndrome. <i>Neuropharmacology</i> 68, 174-183. |
| CNF1                              | De Filippis, B. et al. (2015) Mitochondrial free radical overproduction due to respiratory chain impairment in the brain of a mouse model of Rett syndrome: protective effect of CNF1. <i>Free. Radic. Biol. Med.</i> 83, 167-177.                                       |
| Triheptanoin                      | Park, M. J. et al. (2014) Anaplerotic triheptanoin diet enhances mitochondrial substrate use to remodel the metabolome and improve lifespan, motor function, and sociability in MeCP2-null mice. <i>PLoS One</i> DOI: 10.1371/journal.pone.0109527.                      |
| Phenytoin                         | Herrera, A.J. et al. (2015) Treatment of cardiac arrhythmias in a mouse model of Rett syndrome with Na <sup>+</sup> -channel-blocking antiepileptic drugs. <i>Dis. Model Mech.</i> 8, 363-371.                                                                           |
